# Supplementary material for: MuTAnT: a family of Mutator-like transposable elements targeting TA microsatellites in Medicago truncatula
Source: PubMed Central journal article supplement (PMC4486113; doi:10.1007/s10709-015-9842-5), 2015-05-17

Supplementary figure 1. Sequence logos calculated for 50 bp long terminal parts of 198 *MuTAnTs* copies.

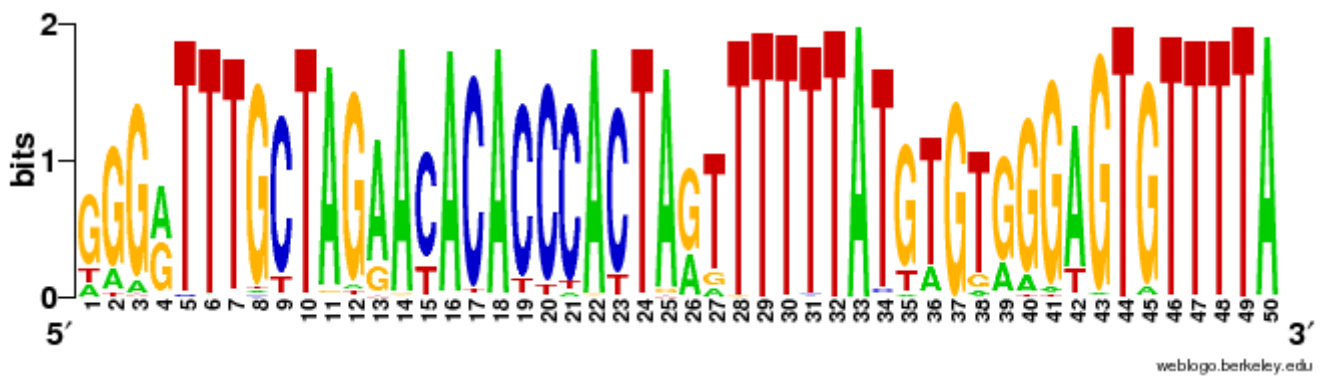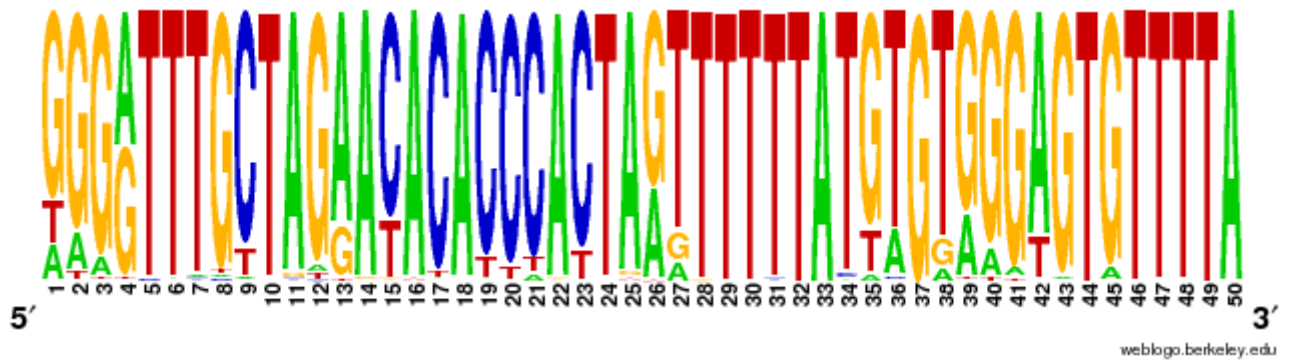

Supplementary figure 2. Graphical visualization of the blastn results of *MuTAnTs* family members obtained with TARGeT pipeline.

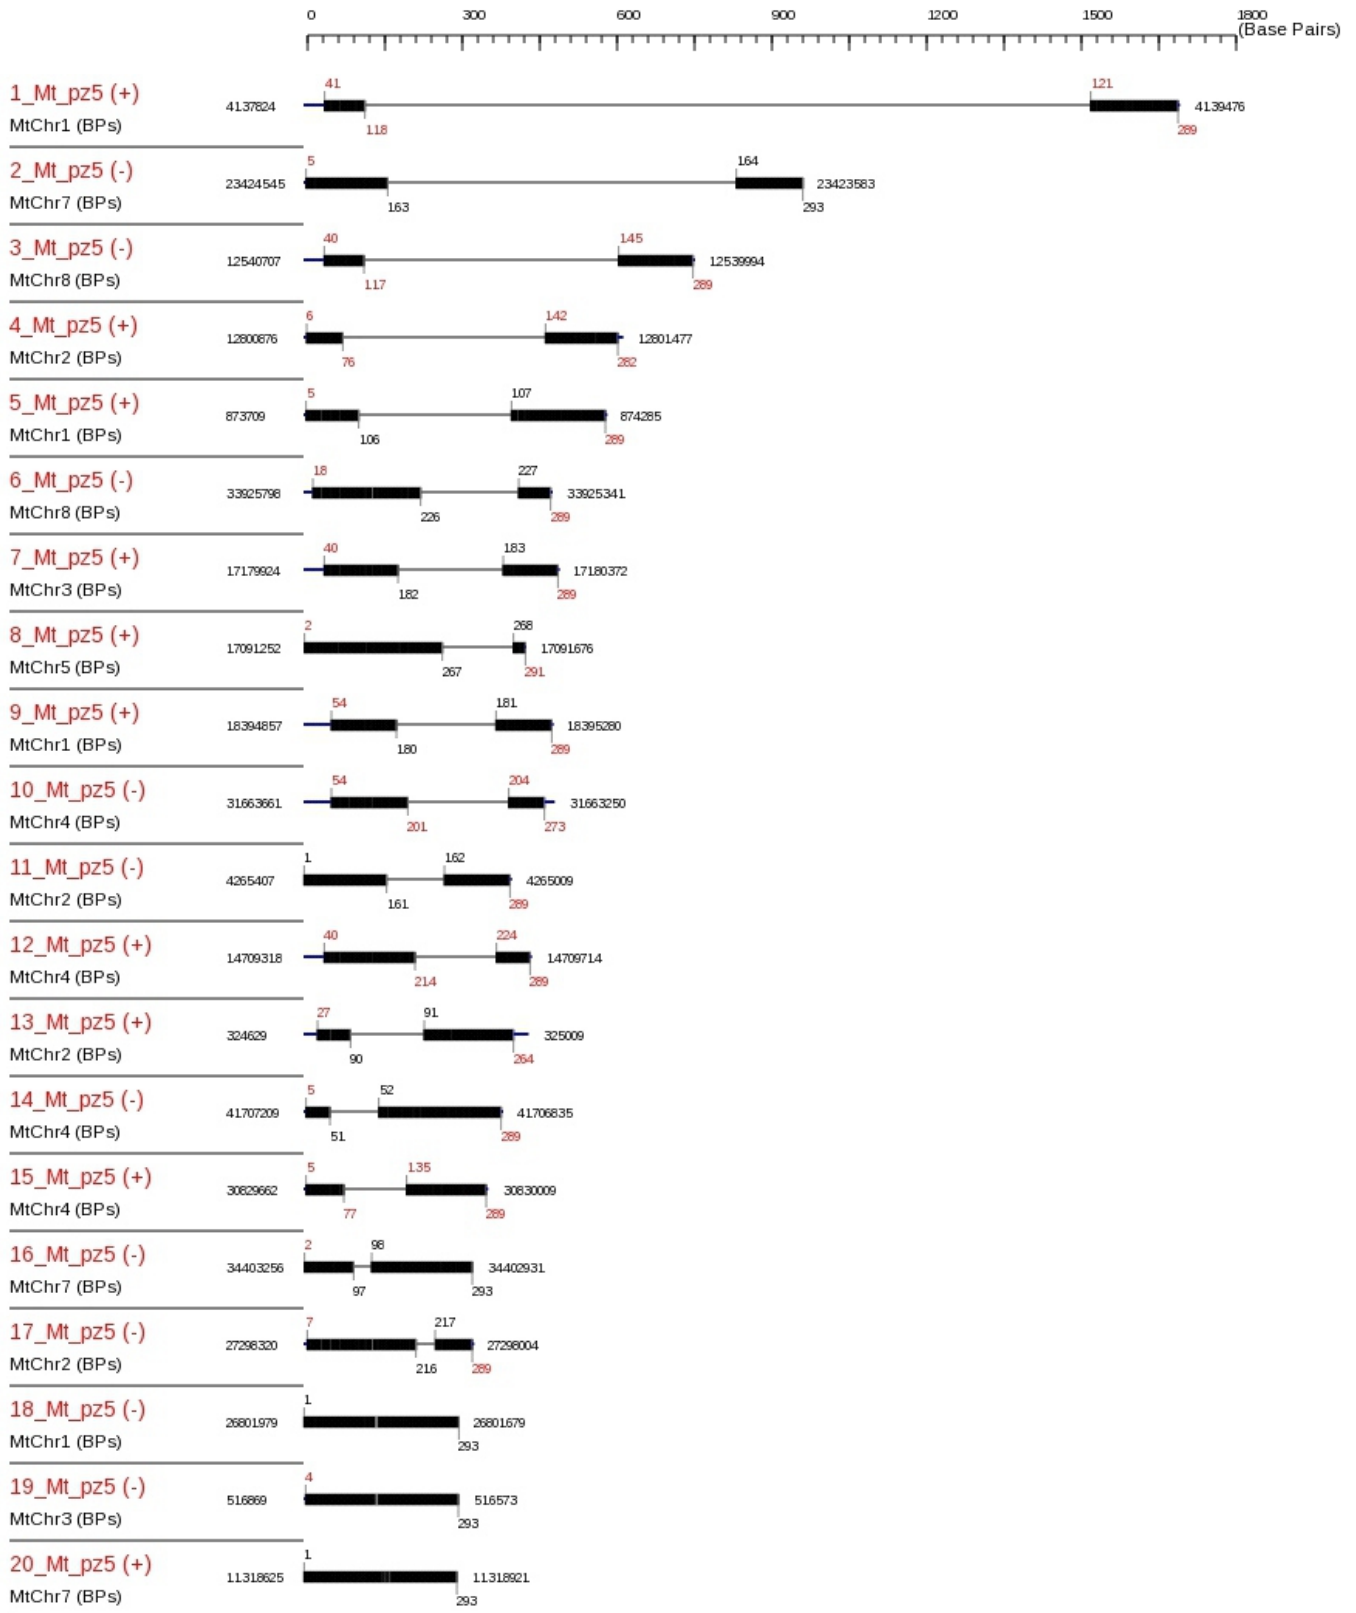

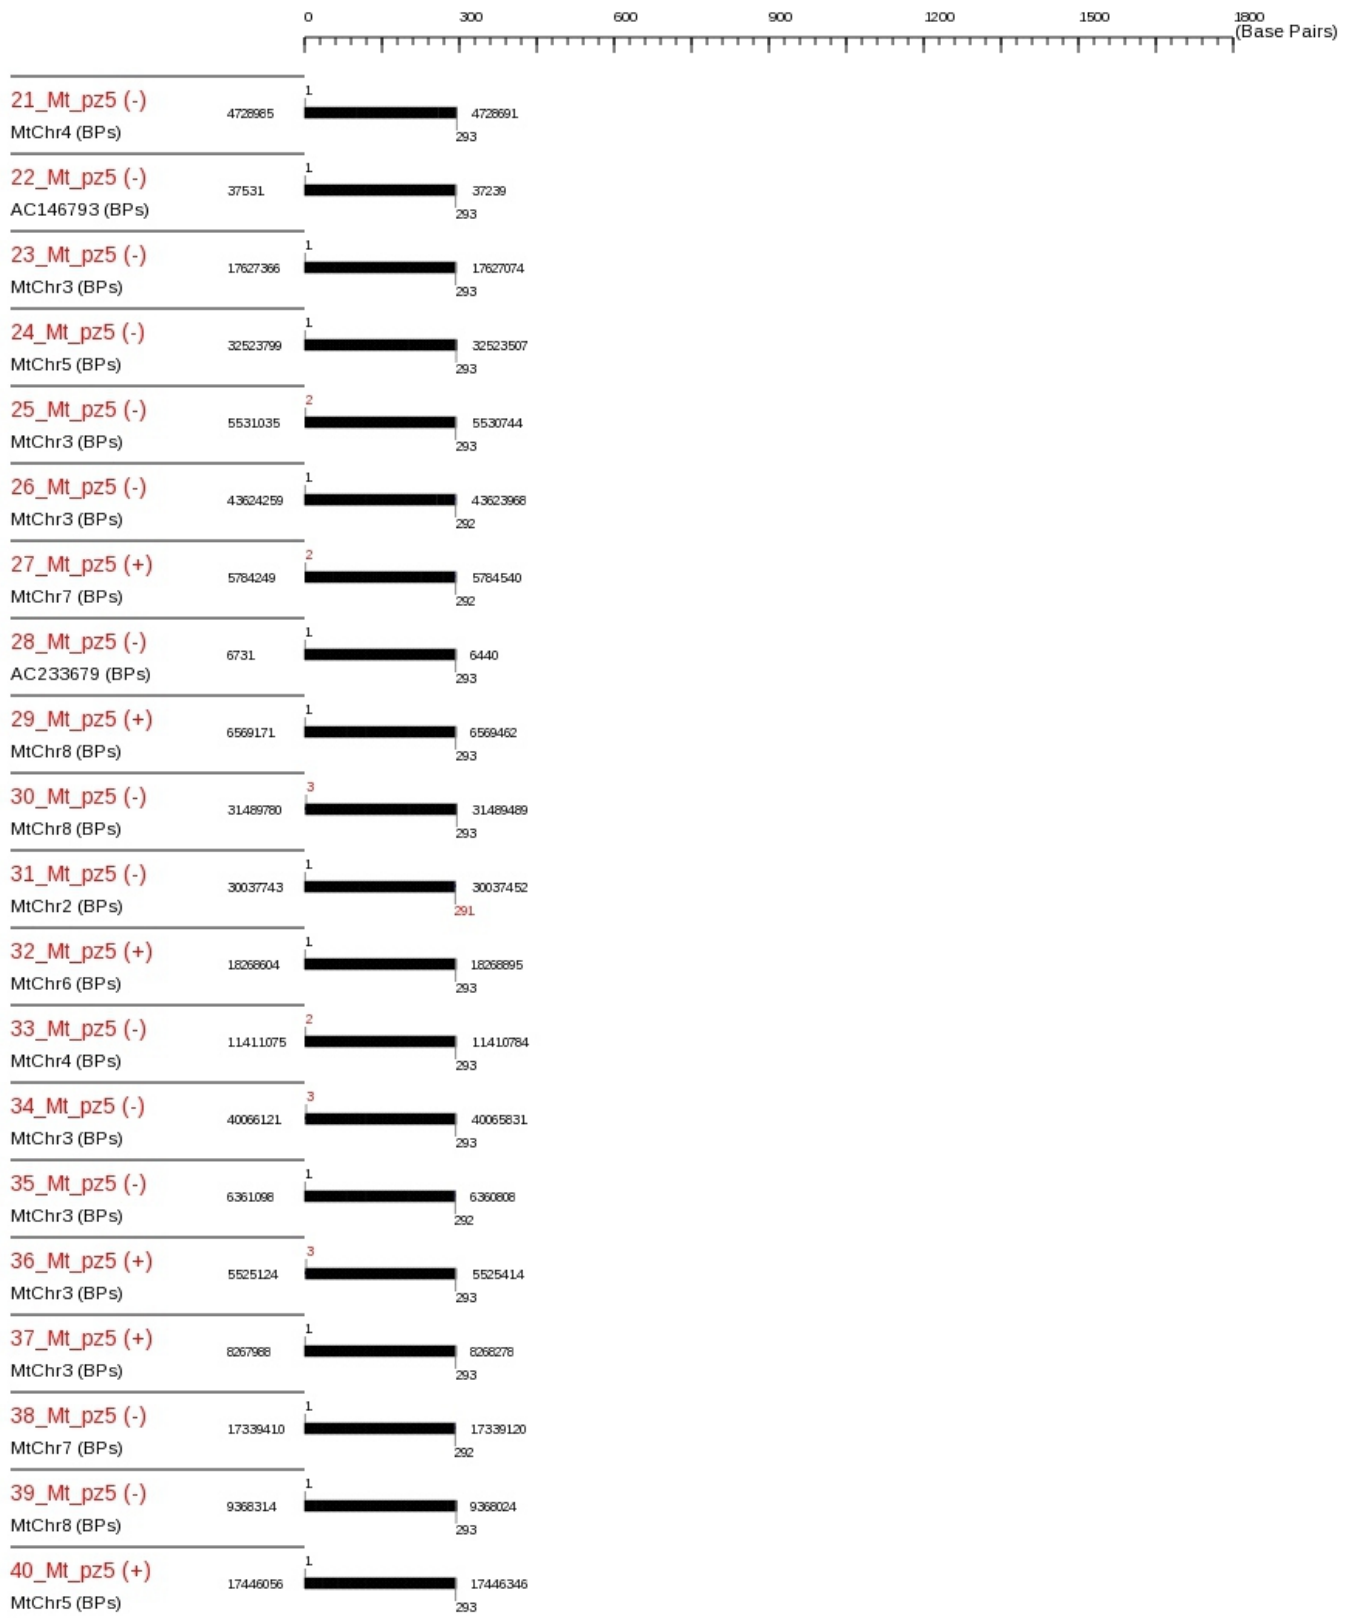

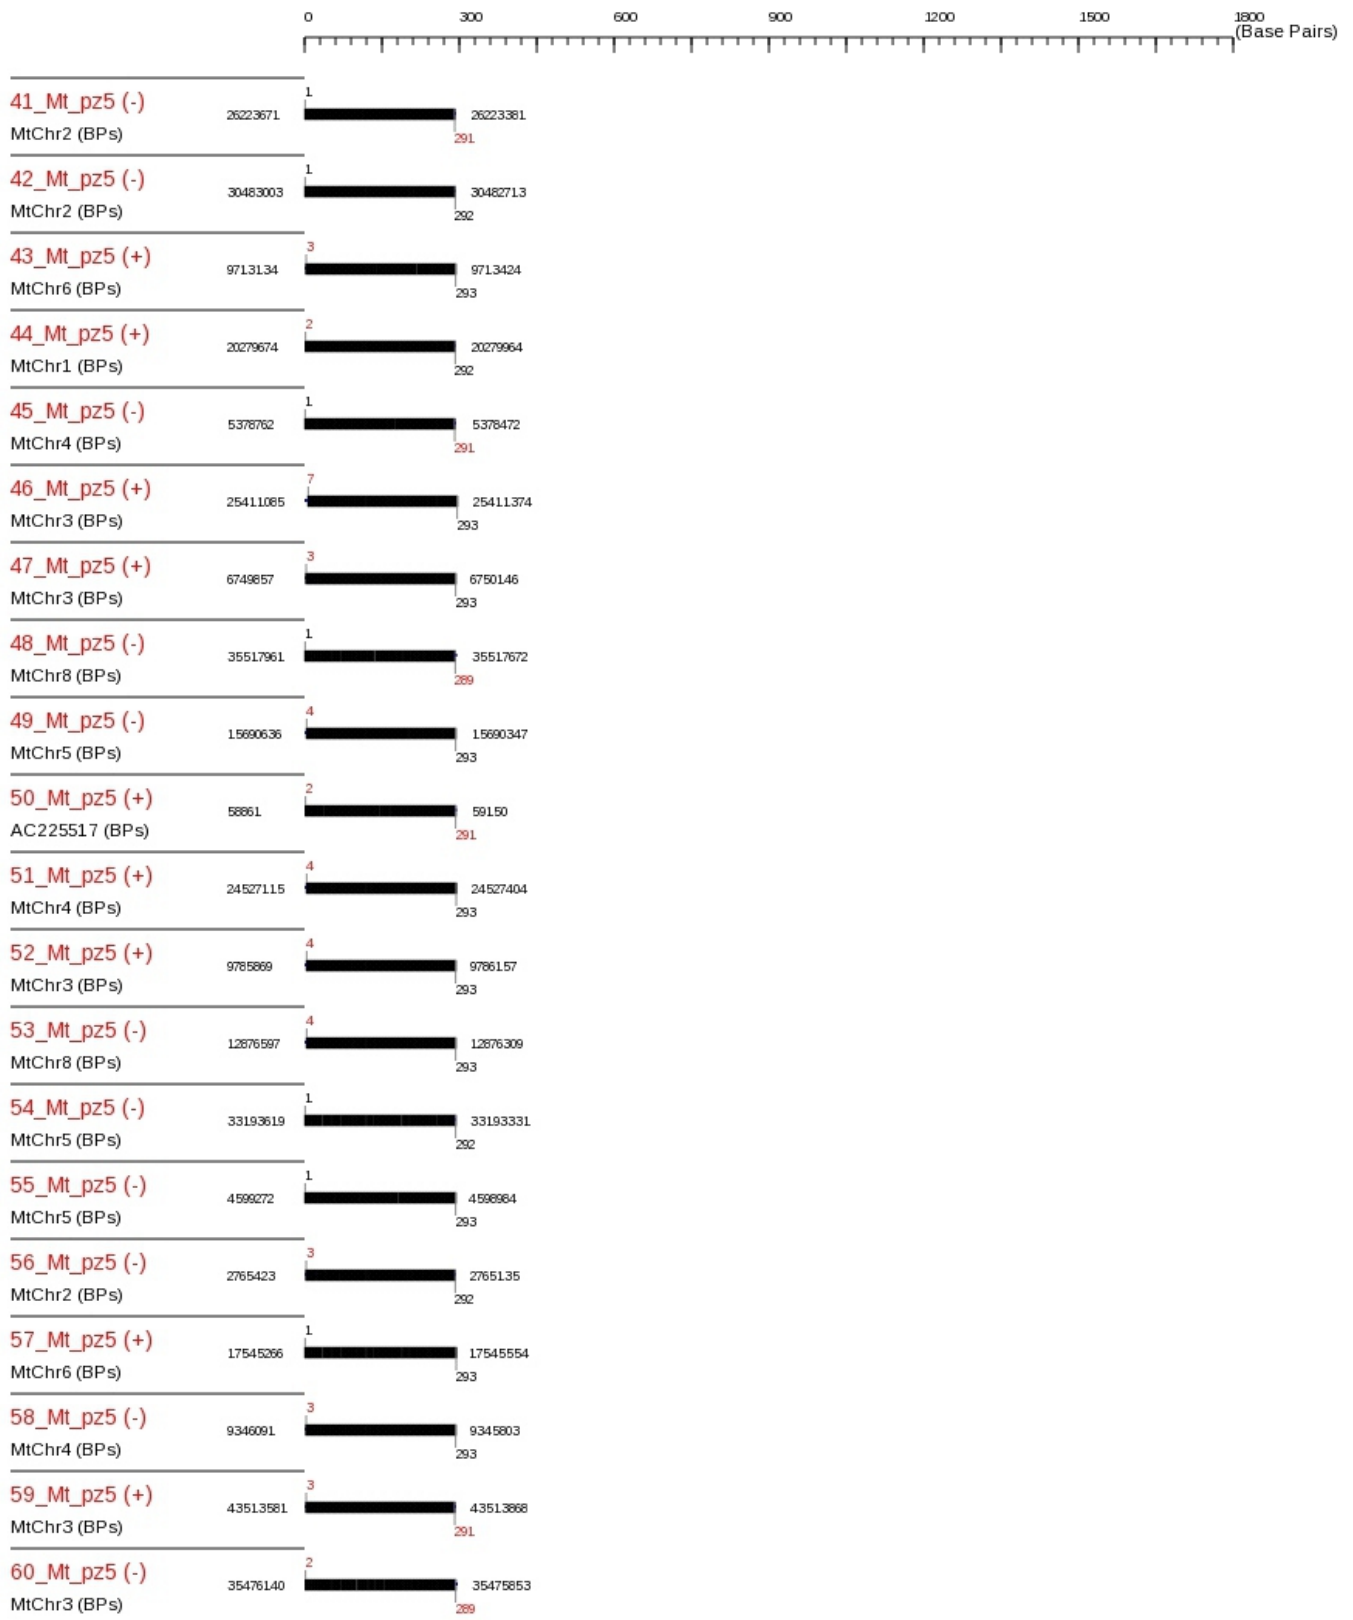

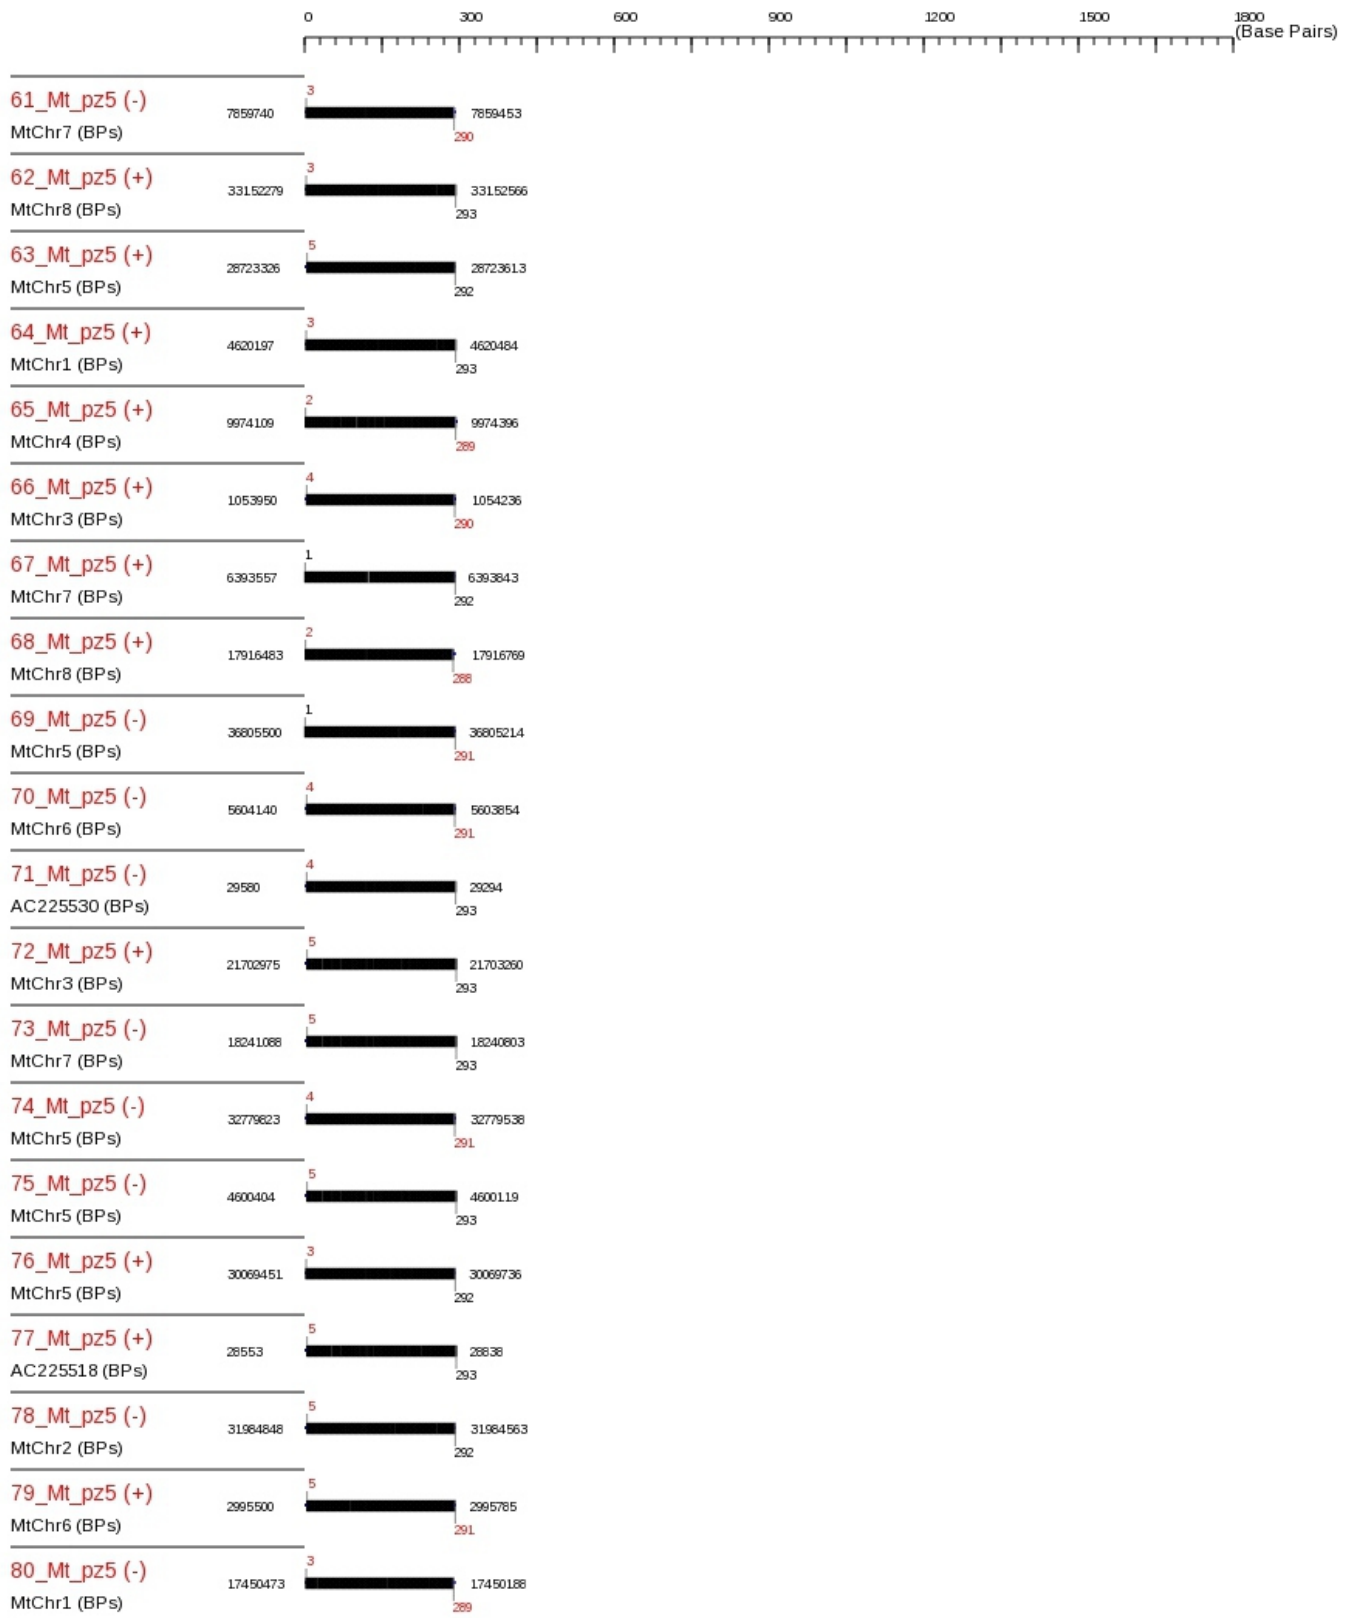

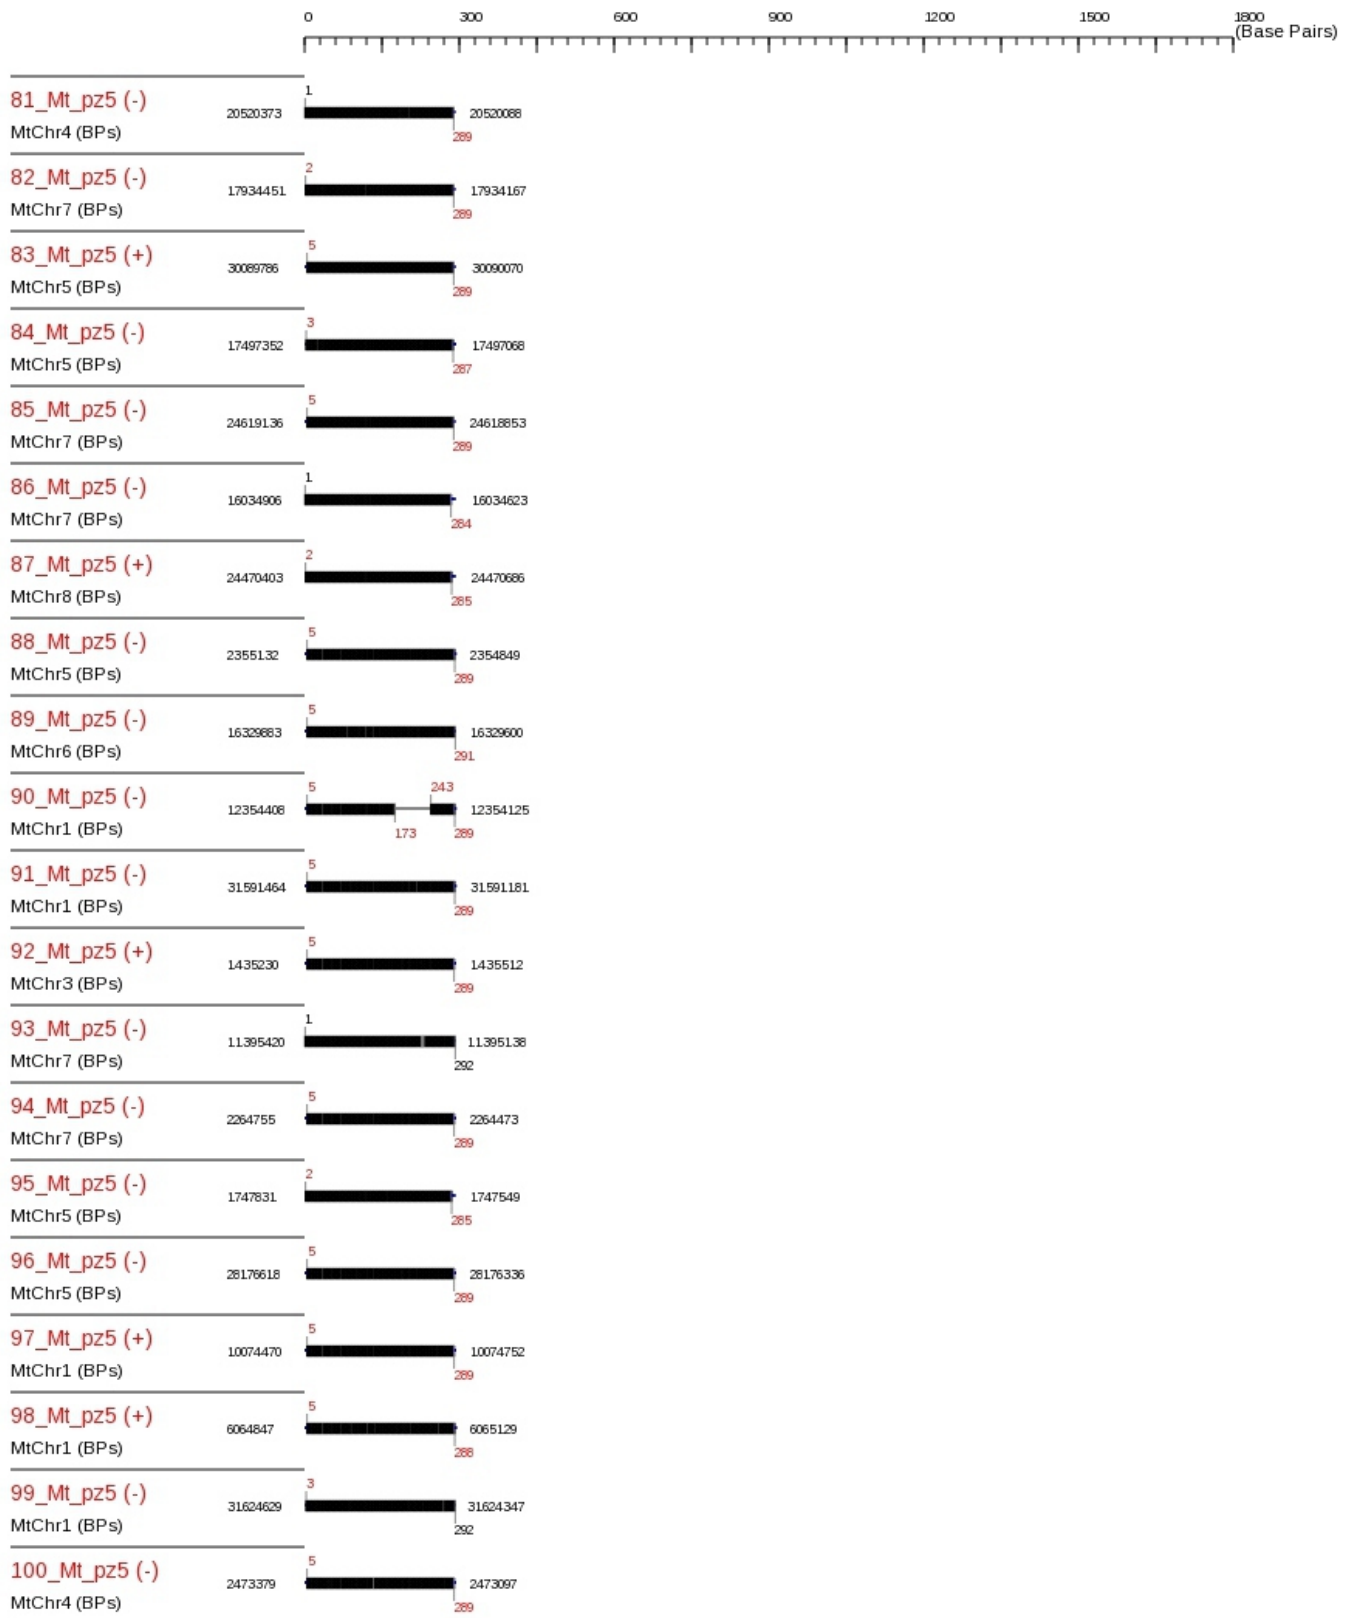

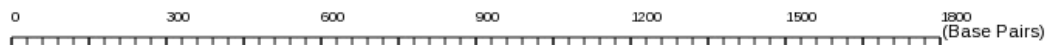

|                |          |          |     |
|----------------|----------|----------|-----|
| 101_Mt_pz5 (+) | 32440004 | 32440285 | 293 |
| MtChr3 (BPs)   |          |          |     |
| 102_Mt_pz5 (-) | 26091112 | 26090631 | 289 |
| MtChr8 (BPs)   |          |          |     |
| 103_Mt_pz5 (+) | 15504912 | 15505193 | 289 |
| MtChr8 (BPs)   |          |          |     |
| 104_Mt_pz5 (-) | 17971975 | 17971694 | 289 |
| MtChr8 (BPs)   |          |          |     |
| 105_Mt_pz5 (-) | 17303354 | 17303073 | 289 |
| MtChr5 (BPs)   |          |          |     |
| 106_Mt_pz5 (-) | 24392667 | 24392386 | 289 |
| MtChr5 (BPs)   |          |          |     |
| 107_Mt_pz5 (-) | 14250611 | 14250330 | 289 |
| MtChr5 (BPs)   |          |          |     |
| 108_Mt_pz5 (+) | 21876815 | 21877096 | 289 |
| MtChr2 (BPs)   |          |          |     |
| 109_Mt_pz5 (-) | 19897505 | 19897224 | 289 |
| MtChr4 (BPs)   |          |          |     |
| 110_Mt_pz5 (-) | 8906446  | 8906165  | 289 |
| MtChr4 (BPs)   |          |          |     |
| 111_Mt_pz5 (+) | 26225003 | 26225283 | 286 |
| MtChr2 (BPs)   |          |          |     |
| 112_Mt_pz5 (-) | 24501360 | 24501080 | 289 |
| MtChr2 (BPs)   |          |          |     |
| 113_Mt_pz5 (+) | 32734601 | 32734881 | 293 |
| MtChr1 (BPs)   |          |          |     |
| 114_Mt_pz5 (+) | 10940424 | 10940704 | 289 |
| MtChr1 (BPs)   |          |          |     |
| 115_Mt_pz5 (+) | 32657794 | 32658074 | 293 |
| MtChr1 (BPs)   |          |          |     |
| 116_Mt_pz5 (-) | 12459810 | 12459530 | 287 |
| MtChr4 (BPs)   |          |          |     |
| 117_Mt_pz5 (+) | 19476443 | 19476722 | 289 |
| MtChr8 (BPs)   |          |          |     |
| 118_Mt_pz5 (+) | 7725831  | 7726110  | 289 |
| MtChr6 (BPs)   |          |          |     |
| 119_Mt_pz5 (+) | 20566248 | 20566526 | 289 |
| MtChr3 (BPs)   |          |          |     |
| 120_Mt_pz5 (-) | 36991854 | 36991576 | 289 |
| MtChr5 (BPs)   |          |          |     |

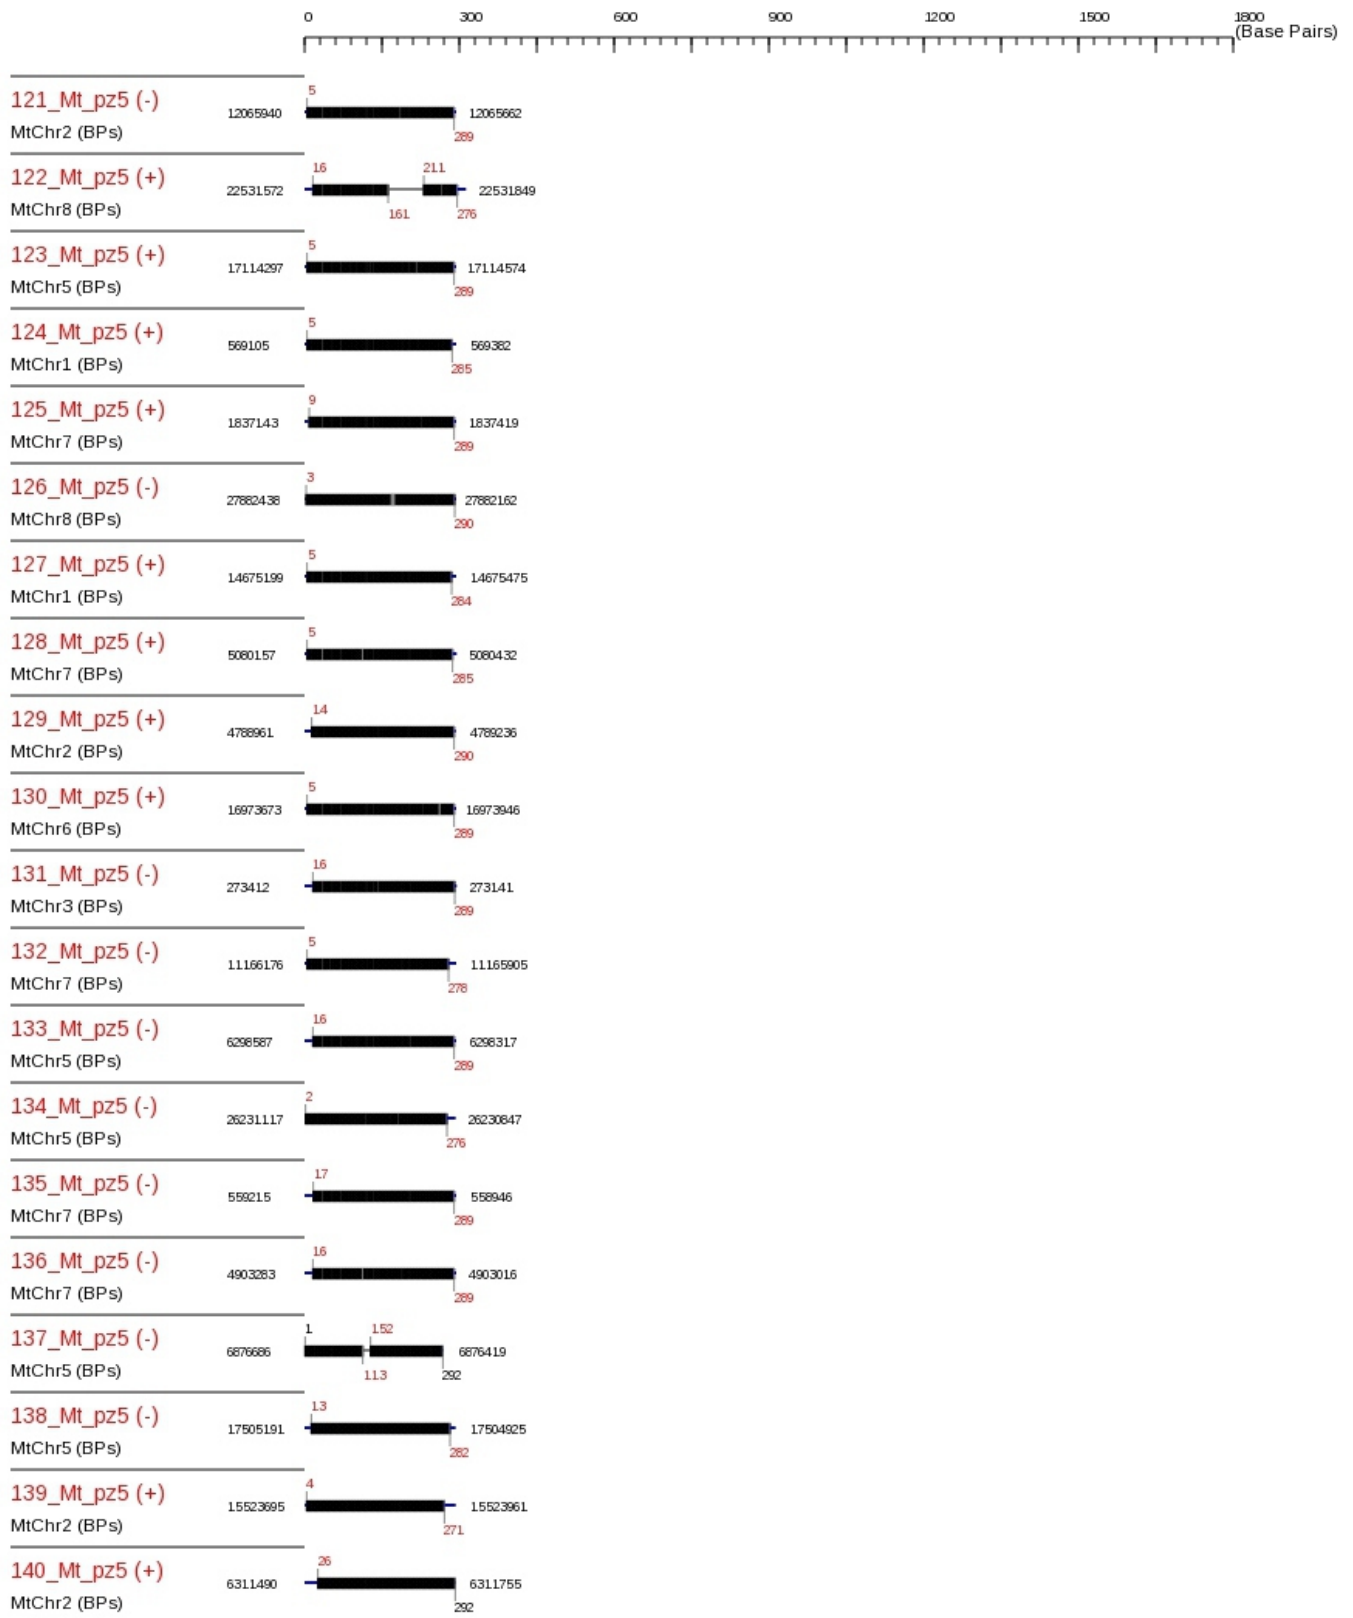



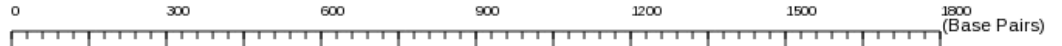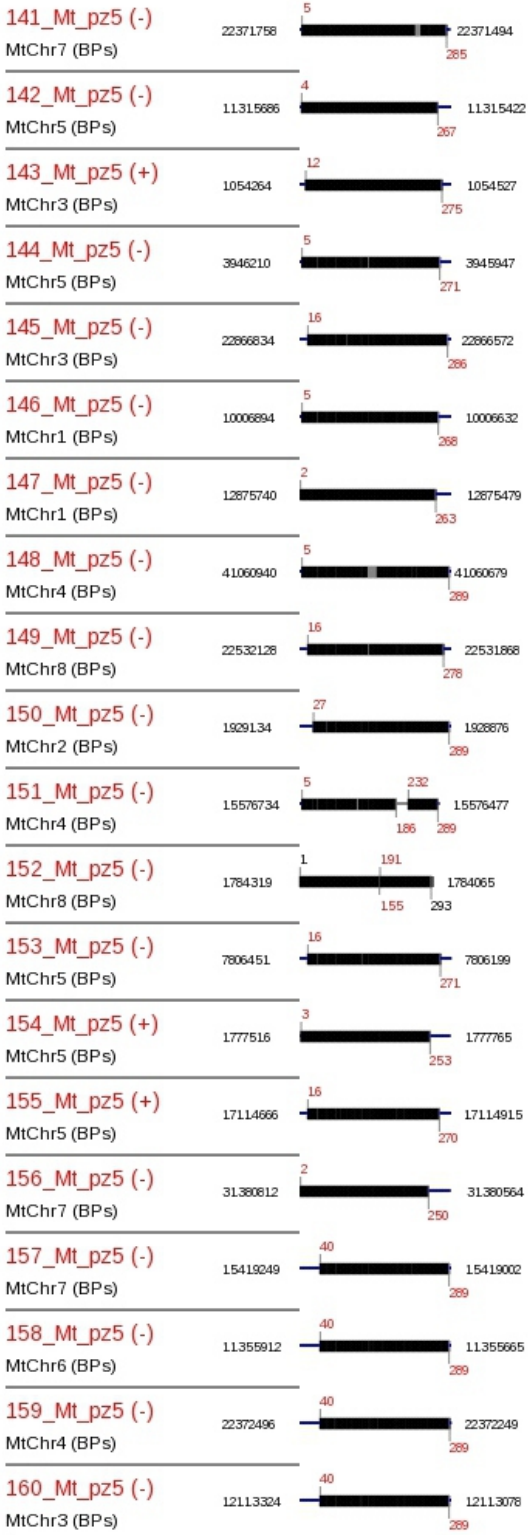

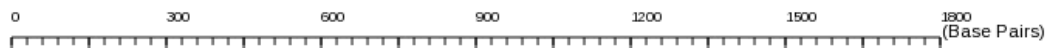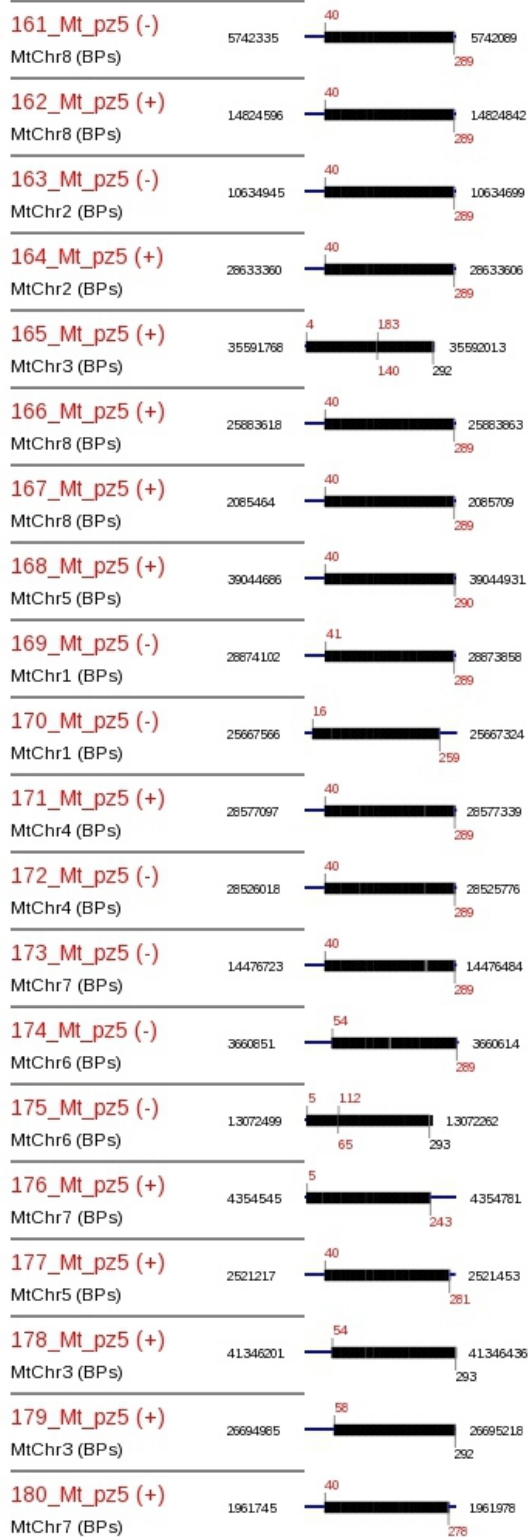

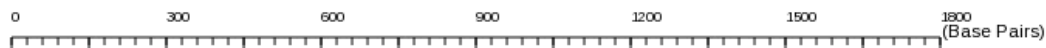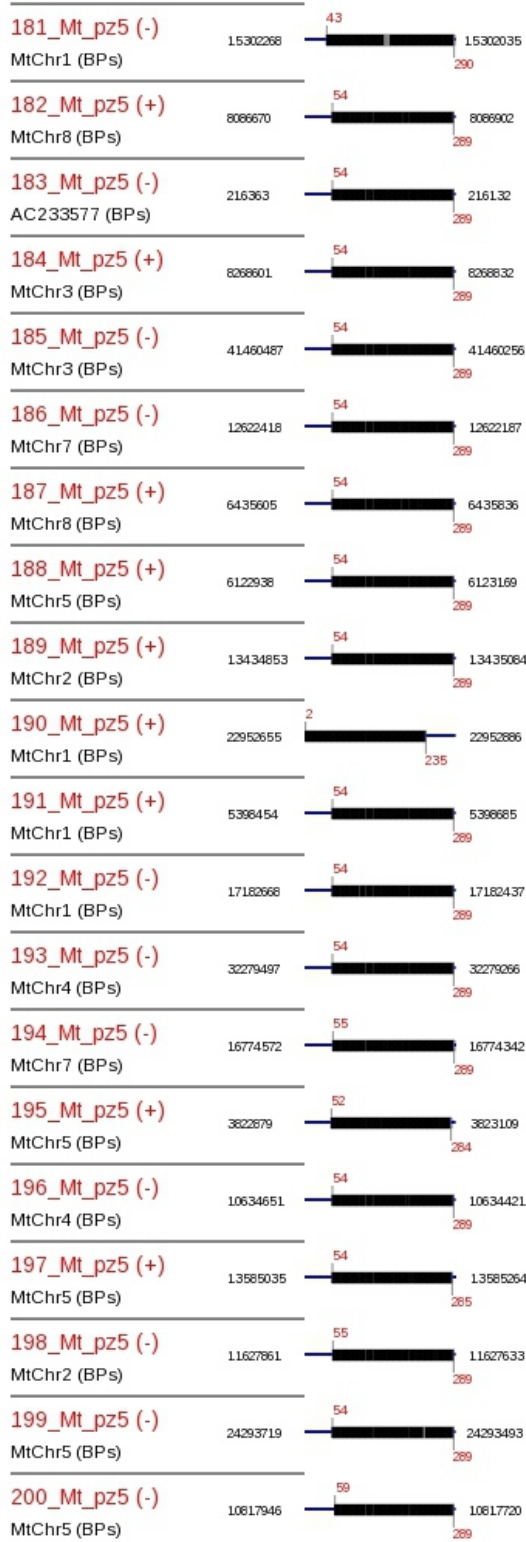

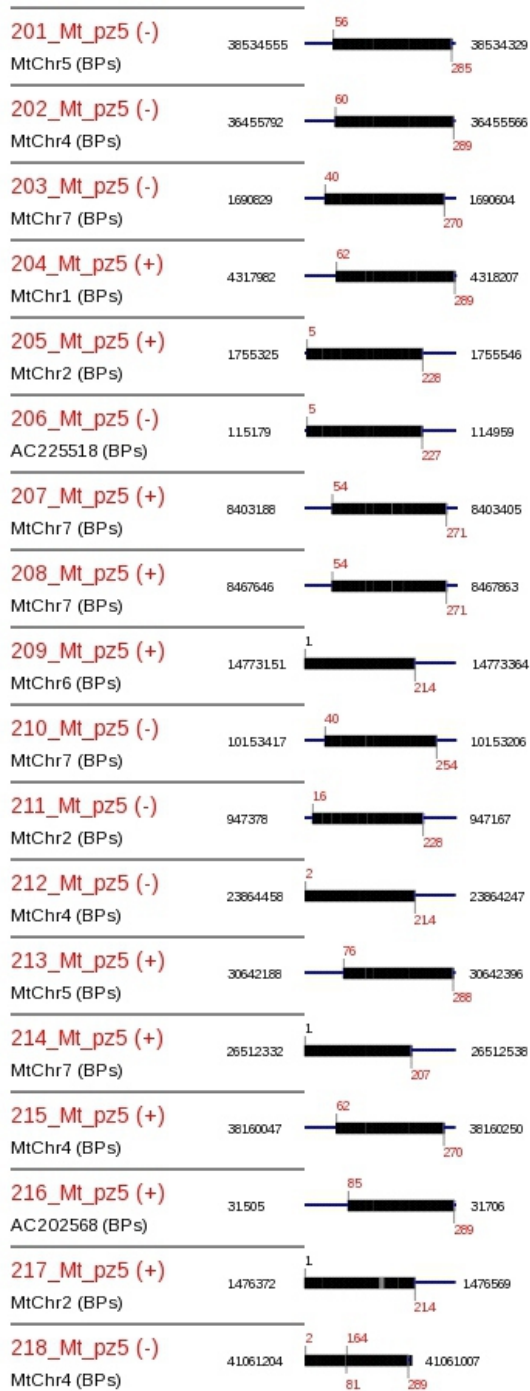

Supplement: 10709_2015_9842_MOESM4_ESM.pdf [file 10709_2015_9842_MOESM4_ESM.pdf]
