# Supplementary material for: MuTAnT: a family of Mutator-like transposable elements targeting TA microsatellites in Medicago truncatula
Source: PubMed Central journal article supplement (PMC4486113; doi:10.1007/s10709-015-9842-5), 2015-05-17
Supplement: 10709_2015_9842_MOESM1_ESM.pdf [file 10709_2015_9842_MOESM1_ESM.pdf]

Supplementary table 1. Complete list of plant material used in the study.

| Genus            | Section              | Subsection          | Species                                                   | Accession code                       |
|------------------|----------------------|---------------------|-----------------------------------------------------------|--------------------------------------|
| <i>Medicago</i>  | <i>Spirocarpos</i>   | <i>Leptospireae</i> | <i>M. minima</i> (L.) Bartal. (eng. little medic)         | 243205 <sup>1</sup>                  |
| <i>Medicago</i>  | <i>Spirocarpos</i>   | <i>Leptospireae</i> | <i>M. laciniata</i> (L.) Mill. (eng. cut-leaf medic)      | 243370 <sup>1</sup>                  |
| <i>Medicago</i>  | <i>Spirocarpos</i>   | <i>Leptospireae</i> | <i>M. polymorpha</i> L. (eng. bur medic)                  | 243207 <sup>1</sup>                  |
| <i>Medicago</i>  | <i>Spirocarpos</i>   | <i>Pachyspireae</i> | <i>M. littoralis</i> Rohde ex Loisel. (eng. strand medic) | 243371 <sup>1</sup>                  |
| <i>Medicago</i>  | <i>Spirocarpos</i>   | <i>Pachyspireae</i> | <i>M. truncatula</i> Gaertn. (eng. barrel medic)          | A17 " <i>Jemalong</i> " <sup>2</sup> |
| <i>Medicago</i>  | <i>Spirocarpos</i>   | <i>Pachyspireae</i> | <i>M. truncatula</i> Gaertn. (eng. barrel medic)          | L049 <sup>2</sup>                    |
| <i>Medicago</i>  | <i>Spirocarpos</i>   | <i>Pachyspireae</i> | <i>M. truncatula</i> Gaertn. (eng. barrel medic)          | L144 <sup>2</sup>                    |
| <i>Medicago</i>  | <i>Spirocarpos</i>   | <i>Pachyspireae</i> | <i>M. truncatula</i> Gaertn. (eng. barrel medic)          | L163 <sup>2</sup>                    |
| <i>Medicago</i>  | <i>Spirocarpos</i>   | <i>Pachyspireae</i> | <i>M. truncatula</i> Gaertn. (eng. barrel medic)          | L174 <sup>2</sup>                    |
| <i>Medicago</i>  | <i>Spirocarpos</i>   | <i>Pachyspireae</i> | <i>M. truncatula</i> Gaertn. (eng. barrel medic)          | L213 <sup>2</sup>                    |
| <i>Medicago</i>  | <i>Spirocarpos</i>   | <i>Pachyspireae</i> | <i>M. truncatula</i> Gaertn. (eng. barrel medic)          | L245 <sup>2</sup>                    |
| <i>Medicago</i>  | <i>Spirocarpos</i>   | <i>Pachyspireae</i> | <i>M. truncatula</i> Gaertn. (eng. barrel medic)          | L290 <sup>2</sup>                    |
| <i>Medicago</i>  | <i>Spirocarpos</i>   | <i>Pachyspireae</i> | <i>M. truncatula</i> Gaertn. (eng. barrel medic)          | L310 <sup>2</sup>                    |
| <i>Medicago</i>  | <i>Spirocarpos</i>   | <i>Pachyspireae</i> | <i>M. truncatula</i> Gaertn. (eng. barrel medic)          | L321 <sup>2</sup>                    |
| <i>Medicago</i>  | <i>Spirocarpos</i>   | <i>Pachyspireae</i> | <i>M. truncatula</i> Gaertn. (eng. barrel medic)          | L337 <sup>2</sup>                    |
| <i>Medicago</i>  | <i>Spirocarpos</i>   | <i>Pachyspireae</i> | <i>M. truncatula</i> Gaertn. (eng. barrel medic)          | L369 <sup>2</sup>                    |
| <i>Medicago</i>  | <i>Spirocarpos</i>   | <i>Pachyspireae</i> | <i>M. truncatula</i> Gaertn. (eng. barrel medic)          | L530 <sup>2</sup>                    |
| <i>Medicago</i>  | <i>Spirocarpos</i>   | <i>Pachyspireae</i> | <i>M. truncatula</i> Gaertn. (eng. barrel medic)          | L543 <sup>2</sup>                    |
| <i>Medicago</i>  | <i>Spirocarpos</i>   | <i>Pachyspireae</i> | <i>M. truncatula</i> Gaertn. (eng. barrel medic)          | L544 <sup>2</sup>                    |
| <i>Medicago</i>  | <i>Spirocarpos</i>   | <i>Pachyspireae</i> | <i>M. truncatula</i> Gaertn. (eng. barrel medic)          | L552 <sup>2</sup>                    |
| <i>Medicago</i>  | <i>Spirocarpos</i>   | <i>Pachyspireae</i> | <i>M. truncatula</i> Gaertn. (eng. barrel medic)          | L554 <sup>2</sup>                    |
| <i>Medicago</i>  | <i>Spirocarpos</i>   | <i>Pachyspireae</i> | <i>M. truncatula</i> Gaertn. (eng. barrel medic)          | L555 <sup>2</sup>                    |
| <i>Medicago</i>  | <i>Spirocarpos</i>   | <i>Pachyspireae</i> | <i>M. truncatula</i> Gaertn. (eng. barrel medic)          | L557 <sup>2</sup>                    |
| <i>Medicago</i>  | <i>Spirocarpos</i>   | <i>Pachyspireae</i> | <i>M. truncatula</i> Gaertn. (eng. barrel medic)          | L648 <sup>2</sup>                    |
| <i>Medicago</i>  | <i>Spirocarpos</i>   | <i>Pachyspireae</i> | <i>M. truncatula</i> Gaertn. (eng. barrel medic)          | A20 <sup>2</sup>                     |
| <i>Medicago</i>  | <i>Spirocarpos</i>   | <i>Pachyspireae</i> | <i>M. truncatula</i> Gaertn. (eng. barrel medic)          | 2HA <sup>2</sup>                     |
| <i>Medicago</i>  | <i>Spirocarpos</i>   | <i>Pachyspireae</i> | <i>M. truncatula</i> Gaertn. (eng. barrel medic)          | R108 <sup>2</sup>                    |
| <i>Medicago</i>  | <i>Lupularia</i>     | –                   | <i>M. lupulina</i> L. (eng. black medic)                  | 243372 <sup>1</sup>                  |
| <i>Medicago</i>  | <i>Medicago</i>      | –                   | <i>M. sativa</i> L. (eng. alfalfa)                        | 243208 <sup>1</sup>                  |
| <i>Medicago</i>  | <i>Medicago</i>      | –                   | <i>M. x varia</i> Martyn. (eng. bastard medic)            | 243096 <sup>1</sup>                  |
| <i>Medicago</i>  | <i>Medicago</i>      | –                   | <i>M. falcata</i> L. (eng. sickle alfalfa)                | 243267 <sup>1</sup>                  |
| <i>Lupinus</i>   | –                    | –                   | <i>L. angustifolius</i> L. (eng. narrow-leaf lupin)       | Kardyl <sup>3</sup>                  |
| <i>Lupinus</i>   | –                    | –                   | <i>L. luteus</i> L. (eng. yellow lupin)                   | Dukat <sup>3</sup>                   |
| <i>Pisum</i>     | –                    | –                   | <i>P. sativum</i> L. (eng. pea)                           | Cysterski <sup>3</sup>               |
| <i>Phaseolus</i> | –                    | –                   | <i>P. vulgaris</i> L. (eng. bean)                         | Złota saxa <sup>3</sup>              |
| <i>Trifolium</i> | <i>Trifolium</i>     | –                   | <i>T. pratense</i> L. (eng. cowgrass clover)              | 243118 <sup>1</sup>                  |
| <i>Trifolium</i> | <i>Trifoliastrum</i> | –                   | <i>T. repens</i> L. (eng. Dutch clover)                   | 243125 <sup>1</sup>                  |
| <i>Vicia</i>     | <i>Faba</i>          | –                   | <i>V. faba</i> L. (eng. bell-bean)                        | Bizon <sup>3</sup>                   |

<sup>1</sup> National Center for Plant Genetic Resources at the The Plant Breeding and Acclimatization Institute, Radzikow, Poland<sup>2</sup> French National Institute for Agricultural Research, Montpellier, France<sup>3</sup> PlantiCo, Zielonki, Poland

Supplementary Table 2. Complete list of primers used in the study.

| Insertion sites                            | Primers (5'-3')              |                            |
|--------------------------------------------|------------------------------|----------------------------|
| 22                                         | CCCTAGGTTTGCCATGTTGT         | CGACTTGGTGGCCACTTTAT       |
| 23                                         | GGCGTTGAACCTTCATGATT         | TCTGCCGGTCCCATAACTTA       |
| 25                                         | CTTGCTTTTGTGTGGGGTA          | TCAAAGAATTCTAACCGCCG       |
| 32                                         | CCGACGACATCGTGTCCCGTCTTTCCAA | CATTCCAAGGCCACCACCAACGTC   |
| 33                                         | AACTAATTTCCCCTGATAACTGTAGA   | AAACCATAACGTAAGTGAAAACTAAC |
| 36                                         | CGAATTAACCTCCGATGCTGA        | ACACTGCCATAAGGCTCCAC       |
| 41                                         | TTGCTCCATTTGTTCTCACG         | GTGGAAGGCATGGATTTTGT       |
| 42                                         | AGCGGTGCTAAATCAGAGGA         | AGATTTTTGACCCGTGCTCC       |
| 47                                         | AGTTGTTGGTTCTTGATCCATTT      | CAAGAACTCTTCTTACAATTTTGT   |
| 52                                         | TAGAAATACAATGACATGTGGGATG    | AGACATAGAGATTGGAAATTGTTGC  |
| 63                                         | TTGACAATGAGAGGTTGACTTAAAA    | TTTCTTTTTAAGAGGAATCAGTGACA |
| 76                                         | TCATTTTACCGGATTCTTTTCA       | GAACCCATTCAACAACACGA       |
| 83                                         | CAACCTCGAACCTGACCAAT         | GAAAAGGTTCCCAACGTGAA       |
| 111                                        | CCCAGGAAATCTGGGAATTT         | GGAAAAACATTGCCTTGGTG       |
| 111                                        | GCTAACCAACTTCACTTCAAACAGT    | ACGGCATAAAAAGAGGAGAATAAACT |
| <b>Amplification of the DDE/DDD domain</b> | AATCGATGAAAATAACAAATTGGAG    |                            |
|                                            | TAAAATCATCGTATCTCGACCCTAA    |                            |
|                                            | AATCGATGAAAATAACAAATTGGAG    |                            |
